# Supplementary material for: For Better or Worse? Couples’ Time Together in Encore Adulthood
Source: Oxford University Press journal article supplement (doi:10.1093/geronb/gbx129), 2017-09-26
Supplement: gbx129_suppl_supplementary_tables.docx [file gbx129_suppl_supplementary_tables.docx]

| Appendix Table 1.  *Summary measures for couples aged 50-79* | | | | | | |
| --- | --- | --- | --- | --- | --- | --- |
|  |  | Couple |  | Husband |  | Wife |
| Family Type | |  |  |  |  |  |
|  | Spouse only | 0.693 |  |  |  |  |
|  | Children (under 18) | 0.038 |  |  |  |  |
|  | Children (18+) | 0.222 |  |  |  |  |
|  | Parent(s) | 0.011 |  |  |  |  |
|  | Other(s) | 0.036 |  |  |  |  |
| Work Status | |  |  |  |  |  |
|  | Neither working | 0.328 |  |  |  |  |
|  | Both working | 0.336 |  |  |  |  |
|  | Only husband works | 0.204 |  |  |  |  |
|  | Only wife works | 0.132 |  |  |  |  |
| Age |  |  |  |  |  |  |
|  | 50-54 |  |  | 0.255 |  | 0.164 |
|  | 55-59 |  |  | 0.244 |  | 0.228 |
|  | 60-64 |  |  | 0.203 |  | 0.212 |
|  | 65-69 |  |  | 0.149 |  | 0.170 |
|  | 70-74 |  |  | 0.100 |  | 0.127 |
|  | 75-79 |  |  | 0.048 |  | 0.099 |
| Education | |  |  |  |  |  |
|  | Less than high school |  |  | 0.116 |  | 0.095 |
|  | High school |  |  | 0.309 |  | 0.366 |
|  | Some college |  |  | 0.233 |  | 0.257 |
|  | College degree |  |  | 0.341 |  | 0.281 |
| Race | |  |  |  |  |  |
|  | White |  |  | 0.817 |  | 0.814 |
|  | Black |  |  | 0.073 |  | 0.070 |
|  | Other |  |  | 0.036 |  | 0.040 |
|  | Hispanic |  |  | 0.073 |  | 0.074 |
|  |  |  |  |  |  |  |
| Observations | | 26,303 |  | 26,303 |  | 26,303 |
| Notes: Sample includes married ATUS respondents ages 50 to 79 from 2003-2014. | | | | | | |

| Appendix Table 2. *Total Shared Time in Minutes for Couples by Birth Cohort* | | | | | | | | |
| --- | --- | --- | --- | --- | --- | --- | --- | --- |
| Birth Cohort |  | Ages |  | 2003/2004 |  | 2013/2014 |  | Difference |
| 1949-1953 |  | 50-54 to 60-64 |  | 243.89 |  | 298.40 |  | 54.51 |
| 1944-1948 |  | 55-59 to 65-69 |  | 279.97 |  | 385.69 |  | 105.72 |
| 1939-1943 |  | 60-64 to 70-74 |  | 338.40 |  | 405.15 |  | 66.75 |
| 1934-1938 |  | 65-69 to 75-79 |  | 353.95 |  | 342.90 |  | -11.05 |
| Note: Sample includes married ATUS respondents ages 50 to 79 from 2003-2014. | | | | | | | | |
